# Supplementary material for: Allosteric activation or inhibition of PI3Kγ mediated through conformational changes in the p110γ helical domain
Source: PubMed Central journal article supplement (PMC10120615; doi:10.1101/2023.04.12.536585), 2023-04-12
Supplement: NIHPP2023.04.12.536585v1-supplement-1.pdf [file NIHPP2023.04.12.536585v1-supplement-1.pdf]

1132  
1133  
1134  
1135  
1136  
1137  
1138  
1139  
1140  
1141  
1142  
1143  
1144  
1145  
1146  
1147  
1148  
1149  
1150  
1151  
1152  
1153  
1154  
1155  
1156  
1157  
1158  
1159  
1160  
1161  
1162  
1163

## Supplemental information for:

### **Allosteric activation or inhibition of PI3K $\gamma$ mediated through conformational changes in the p110 $\gamma$ helical domain**

Noah J Harris<sup>1\*</sup>, Meredith L Jenkins<sup>1\*</sup>, Sung-Eun Nam, Manoj K Rathinaswamy<sup>1</sup>,  
Matthew Parson<sup>1</sup>, Harish Ranga-Prasad<sup>1</sup>, Udit Dalwadi<sup>2</sup>, Brandon E Moeller<sup>1</sup>, Eleanor  
Sheekey<sup>1</sup>, Scott D Hansen<sup>3</sup>, Calvin K Yip<sup>2%</sup>, and John E Burke<sup>1,2%</sup>

<sup>1</sup>Department of Biochemistry and Microbiology, University of Victoria, Victoria, British  
Columbia, V8W 2Y2, Canada

<sup>2</sup>Department of Biochemistry and Molecular Biology, The University of British Columbia,  
Vancouver, British Columbia V6T 1Z3, Canada

<sup>3</sup>Institute of Molecular Biology, University of Oregon, Eugene, OR 97403

\*These authors contributed equally

%To whom correspondence should be addressed: John E. Burke

Tel: 1-250-721-8732, email: [jeburke@uvic.ca](mailto:jeburke@uvic.ca)

[Calvin K Yip](#)

[Tel: 1-604-827-3976](tel:1-604-827-3976), [em ail: calvin.yip@ubc.ca](mailto:calvin.yip@ubc.ca)

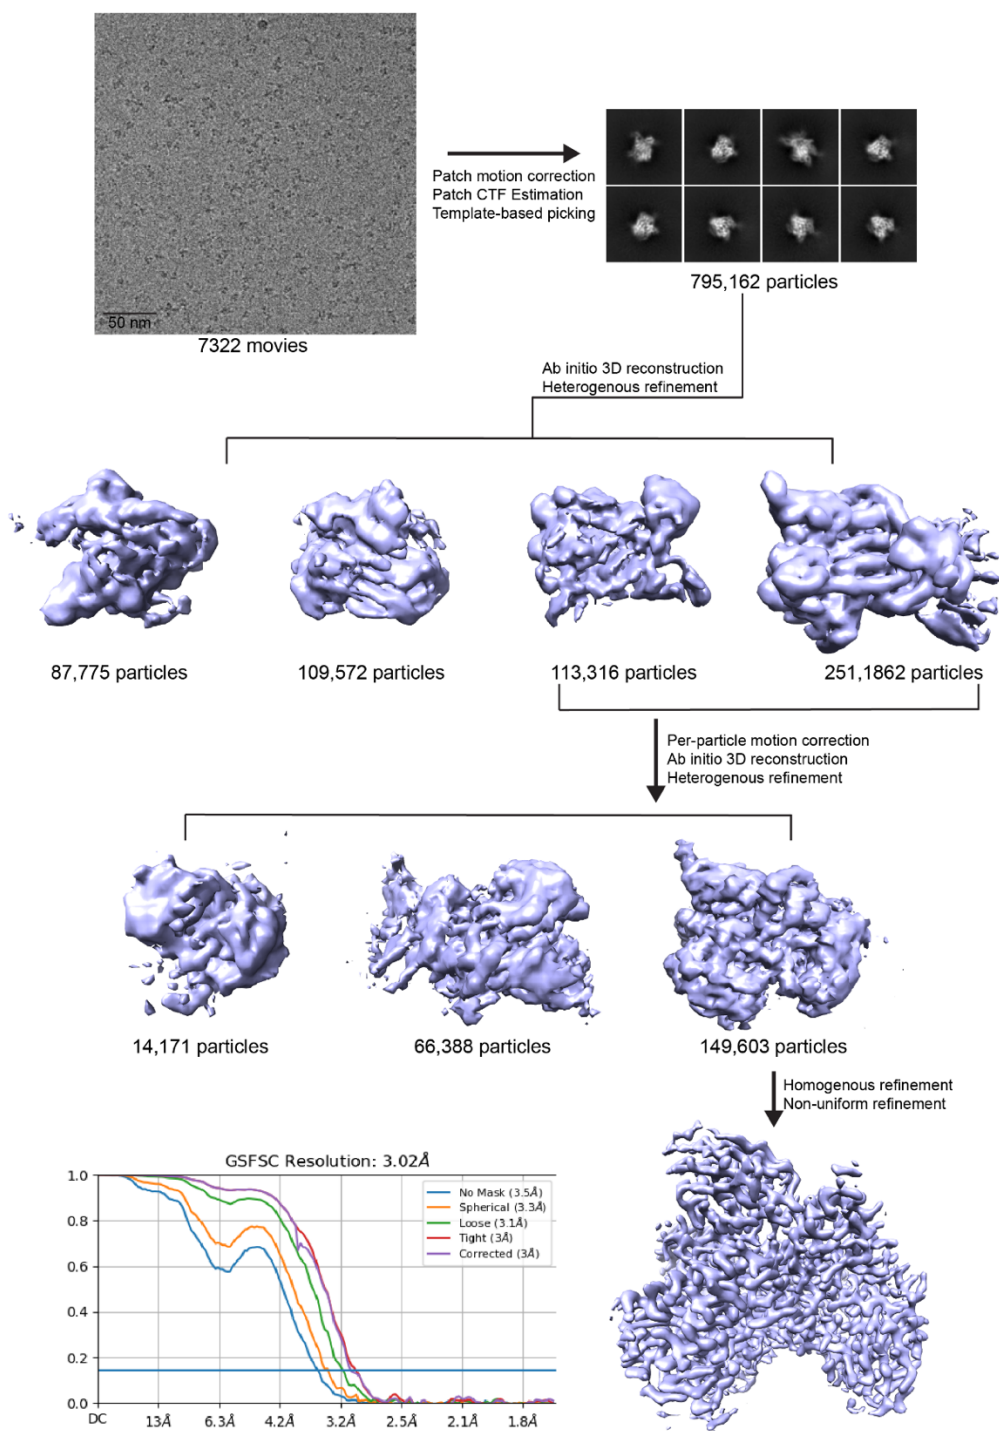

1164  
 1165 **Figure S1. p110 $\gamma$ -NB7 complex cryo-EM analysis workflow (related to main figure 2):** cryo-EM  
 1166 processing workflow of p110 $\gamma$ -NB7 complex are shown in order of a representative micrographs,  
 1167 representative 2D classification and 3D reconstruction processing strategy. Bottom left shows Gold-  
 1168 standard Fourier shell Correlation (FSC) curve of final round on non-uniform homogenous refinement.

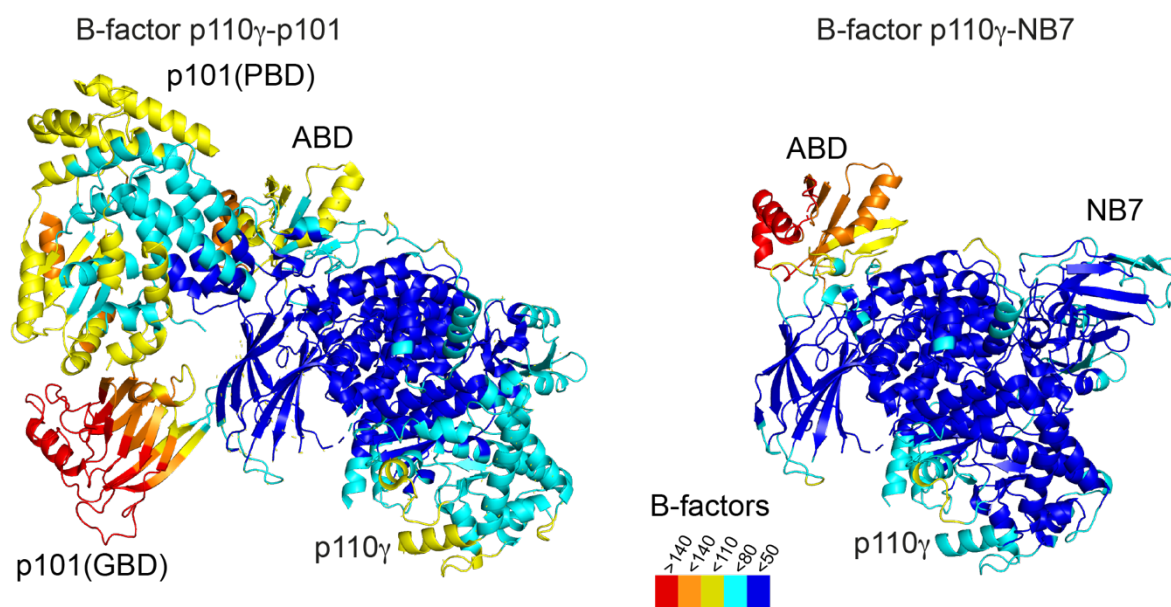

1169

1170 **Figure S2. Comparison of full length p110 $\gamma$  bound to NB7 compared to p110 $\gamma$ -p101 (related to**

1171 **main figure 2): The structure of the p110 $\gamma$ -p101 complex (PDB:7MEZ) compared to the NB7-p110 $\gamma$**

1172 **complex is shown colored according to B factor based on the legend.**

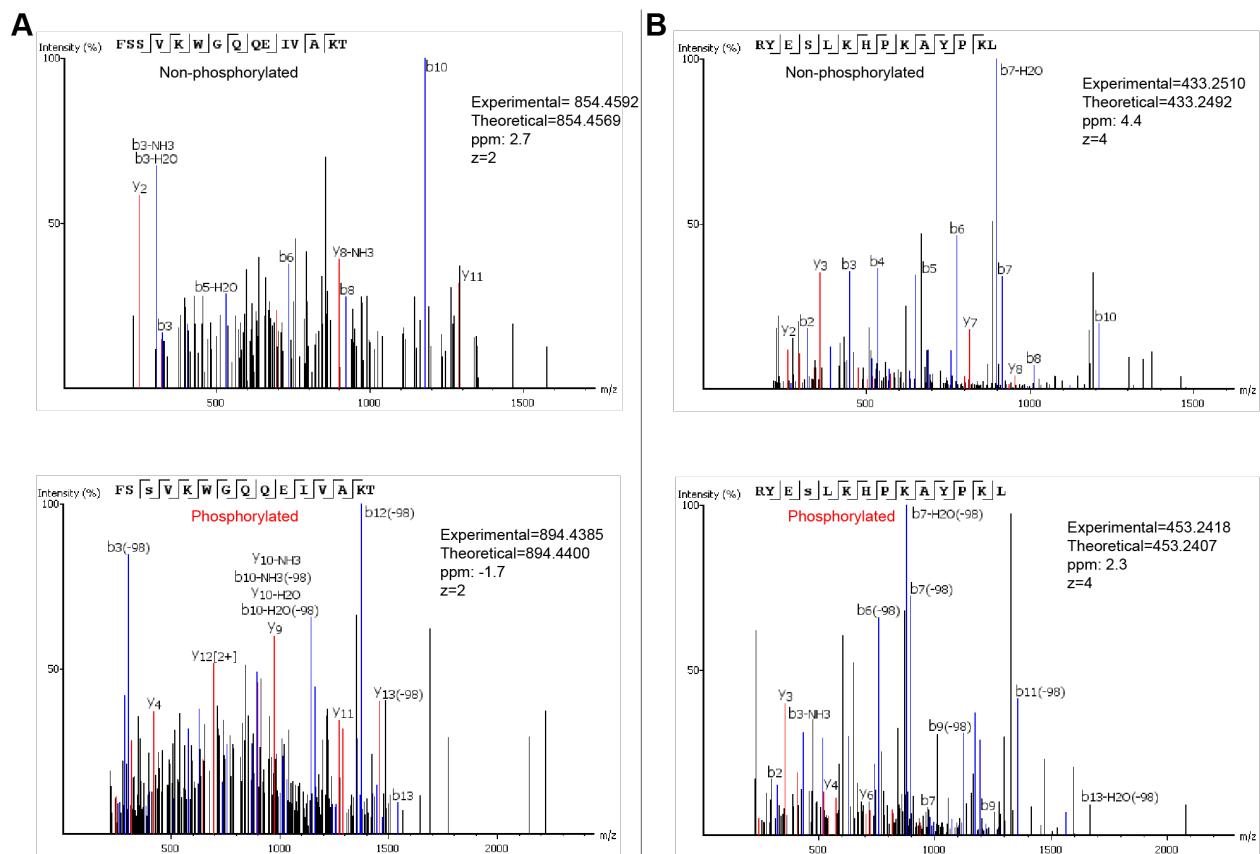

1173  
 1174  
 1175  
 1176  
 1177  
 1178  
 1179  
 1180  
 1181  
 1182  
 1183  
 1184  
 1185  
 1186  
 1187  
 1188  
 1189  
 1190  
 1191  
 1192  
 1193  
 1194

**Figure S3 (related to main figure 3).** MS/MS spectra of peptides spanning S582 and S594/S595 for both phosphorylated and unphosphorylated states. The theoretical and experimental mass are annotated for all peptides.

1195  
1196  
1197

**Supplementary table 1. Cryo-EM data collection, refinement and validation statistics  
(related to main figure 2)**

---

|                                        |                           |
|----------------------------------------|---------------------------|
|                                        | p110 $\gamma$ -NB7        |
|                                        | EMD- 27627                |
|                                        | PDB: 8DP0                 |
| <hr/>                                  |                           |
| <b>Data collection and processing</b>  |                           |
| Magnification                          |                           |
| Voltage (kV)                           | 300                       |
| Electron exposure (e/ $\text{\AA}^2$ ) | 50                        |
| Defocus range (nM)                     | 500-2500                  |
| Pixel size ( $\text{\AA}$ )            |                           |
| Symmetry imposed                       | C1                        |
| Initial particle images (no.)          | 795,162                   |
| Final particle images (no.)            | 149,603                   |
| Map resolution ( $\text{\AA}$ )        | 3.02                      |
| FSC threshold                          | 0.143                     |
| Map resolution range ( $\text{\AA}$ )  | 2.6-4.4                   |
| <b>Refinement</b>                      |                           |
| Initial model used (PDB)               | 7MEZ (p110 $\gamma$ only) |
| Model Resolution ( $\text{\AA}$ )      | 3.02                      |
| FSC threshold                          | 0.5                       |
| Map sharpening B factor                | Sharpened locally         |
| Model composition                      |                           |
| Non-hydrogen atoms                     | 8737                      |
| Protein residues                       | 1,066                     |
| Ligands                                | 0                         |
| <i>B</i> -factors                      |                           |
| Protein                                | 52.4                      |
| Validation                             |                           |
| Mol probability score                  | 1.29                      |
| Clashscore                             | 5.33                      |
| Poor rotamers (%)                      | 0.0                       |
| Ramachandran                           |                           |
| Favored                                | 98.41                     |
| Allowed                                | 1.59                      |
| Outliers                               | 0.0                       |
| R.m.s. deviations                      |                           |
| Bond lengths ( $\text{\AA}$ )          | 0.002                     |
| Bond angles ( $^\circ$ )               | 0.490                     |
| Model to map fit (CC_mask)             | 0.86                      |

---

1198  
1199  
1200  
1201  
1202

1203  
1204  
1205  
1206

**Supplementary table 2. HDX-MS data collection and validation statistics  
(related to main figure 4)**

| Data set                       | p110y unphosphorylated                                                 | p110y phosphorylated                                                   |
|--------------------------------|------------------------------------------------------------------------|------------------------------------------------------------------------|
| HDX reaction details           | %D <sub>2</sub> O=75.5%<br>pH <sub>(read)</sub> =7.5<br>Temp=4°C, 20°C | %D <sub>2</sub> O=75.5%<br>pH <sub>(read)</sub> =7.5<br>Temp=4°C, 20°C |
| HDX time course (seconds)      | 3s at 4°C, 3s, 30s, 300s, 3000s at 20 °C                               | 3s at 4°C, 3s, 30s, 300s, 3000s at 20 °C                               |
| HDX controls                   | N/A                                                                    | N/A                                                                    |
| Back-exchange                  | No correction, deuterium levels are relative                           | No correction, deuterium levels are relative                           |
| Number of peptides             | 244                                                                    | 244                                                                    |
| Sequence coverage              | 98.4%                                                                  | 98.4%                                                                  |
| Average peptide /redundancy    | Length= 15.2<br>Redundancy= 3.3                                        | Length= 15.2<br>Redundancy= 3.3                                        |
| Replicates                     | 3                                                                      | 3                                                                      |
| Repeatability                  | Average StDev=0.53%                                                    | Average StDev=0.57%                                                    |
| Significant differences in HDX | >5% and >0.4 Da and unpaired t-test ≤0.01                              | >5% and >0.4 Da and unpaired t-test ≤0.01                              |

1207
